# Supplementary material for: Multi-element ion-exchange chromatography and high-precision MC-ICP-MS isotope analysis of Mg and Ti from sub-mm-sized meteorite inclusions
Source: Royal Society of Chemistry journal article supplement (doi:10.1039/c7ja00392g), 2018-01-01
Supplement: c7ja00392g1.pdf [file c7ja00392g1.pdf]

**Table S1:** Atomic ratios (cation/Mg) of standards and samples prior to and after processing through the chromatographic separation protocol.

| Sample                           | Type of material        | Na/Mg     | Al/Mg     | Ca/Mg     | Ti/Mg     | V/Mg      | Cr/Mg     | Mn/Mg     | Fe/Mg     | Ni/Mg     | Fraction of cations separated from Mg on column 1 |
|----------------------------------|-------------------------|-----------|-----------|-----------|-----------|-----------|-----------|-----------|-----------|-----------|---------------------------------------------------|
| DTS-2B unprocessed (USGS values) | Dunite                  | 0.000710  | 0.007255  | 0.001832  | ND        | 0.000035  | 0.024313  | 0.001232  | 0.079304  | 0.005253  |                                                   |
| <i>DTS-2B Mg pure</i>            |                         | <0.000710 | <0.000270 | <0.000788 | 0.000008  | 0.000003  | 0.000007  | <0.000013 | <0.000348 | <0.000008 | 0.75                                              |
| BIR-1 unprocessed (USGS values)  | Icelandic Basalt        | 0.244028  | 1.263308  | 0.985475  | 0.049947  | 0.002529  | 0.002957  | 0.010248  | 0.589543  | 0.001203  |                                                   |
| <i>BIR-1 Mg pure</i>             |                         | 0.000956  | 0.000464  | 0.001253  | 0.000020  | <0.000001 | <0.000002 | <0.000004 | <0.000131 | <0.000004 | 0.95                                              |
| Allende unprocessed              | CV bulk                 | 0.020446  | 0.101790  | 0.045960  | 0.002547  | 0.000269  | 0.009962  | 0.004007  | 0.666578  | 0.034655  |                                                   |
| <i>Allende Mg pure</i>           |                         | <0.000317 | <0.000450 | <0.000121 | <0.000051 | <0.000005 | 0.000301  | 0.000015  | <0.000026 | <0.000004 | 0.93                                              |
| Tennasilim unprocessed           | Ordinary chondrite, L4  | 0.043146  | 0.059424  | 0.037839  | 0.001791  | 0.000127  | 0.004121  | 0.006926  | 0.412664  | 0.018663  |                                                   |
| <i>Tennasilim Mg pure</i>        |                         | 0.001162  | 0.000635  | 0.001012  | 0.000019  | <0.000001 | <0.000002 | <0.000004 | <0.000174 | <0.000004 | 0.92                                              |
| J11 unprocessed                  | Olivine from Iherzolite | ND        | 0.001130  | ND        | 0.000039  | 0.000004  | 0.000140  | 0.001388  | 0.093683  | 0.004101  |                                                   |
| <i>J11 Mg pure</i>               |                         | <0.000529 | <0.000450 | <0.000182 | <0.000039 | <0.000004 | <0.000140 | 0.000006  | <0.000174 | <0.000004 | 0.96                                              |
| A62 unprocessed                  | CAI                     | 0.057172  | 7.478637  | 4.041234  | 0.117127  | 0.001913  | 0.003010  | 0.000983  | 0.125345  | 0.000925  |                                                   |
| <i>A62 Mg pure</i>               |                         | ND        | <0.000180 | <0.000485 | <0.000041 | <0.000010 | 0.000071  | 0.000202  | 0.000135  | 0.000096  | 0.996                                             |
| A3 unprocessed                   | CAI                     | 0.892728  | 2.724007  | 0.602016  | 0.024567  | 0.002229  | 0.008642  | 0.005656  | 0.630415  | 0.001036  |                                                   |
| <i>A3 Mg pure</i>                |                         | ND        | <0.000090 | <0.000303 | <0.000025 | <0.000005 | 0.000020  | 0.000172  | <0.000087 | <0.000021 | 0.86                                              |

**Table S2:** Atomic ratios (cation/Ti) of standards and samples prior to and after processing through the chromatographic separation protocol.

| Sample                           | Type of material       | Ca/Ti   | V/Ti     | Cr/Ti    |
|----------------------------------|------------------------|---------|----------|----------|
| BHVO-2 unprocessed (USGS values) | Hawaiian Basalt        | 5.9864  | 0.023227 | 0.020516 |
| <i>BHVO-2 Ti pure</i>            |                        | 0.0010  | 0.000001 | 0.000004 |
| BCR-2 unprocessed (USGS values)  | Columbia River Basalt  | 4.5031  | 0.028955 | 0.001227 |
| <i>BCR-2 Ti pure</i>             |                        | 0.0217  | 0.000001 | 0.000009 |
| BIR-1 unprocessed (USGS values)  | Icelandic Basalt       | 19.7304 | 0.050624 | 0.059197 |
| <i>BIR-1 Ti pure</i>             |                        | 0.0038  | 0.000003 | 0.000019 |
| Alfianello unprocessed           | Ordinary chondrite, L6 | 14.3990 | 0.103000 | 5.581000 |
| <i>Alfianello Ti pure</i>        |                        | 0.0332  | 0.000001 | 0.000079 |
| A62 unprocessed                  | CAI                    | 34.5030 | 0.016333 | 0.025702 |
| <i>A62 Ti pure</i>               |                        | 0.0012  | 0.000007 | 0.000597 |
| A3 unprocessed                   | CAI                    | 24.5047 | 0.090724 | 0.351768 |
| <i>A3 Ti pure</i>                |                        | 0.0066  | 0.000002 | 0.000032 |

Note: ND = Not Determined
